# Supplementary material for: Economics and Preventing Hospital-acquired Infection
Source: PubMed Central journal article supplement (PMC3086182; doi:10.3201/eid1004.020754), 2004-04
Supplement: 02-0754-app2-s2.pdf [file 02-0754-app2-s2.pdf]

## Appendix 2. Calculating the net costs of hospital-acquired infection

### Assumptions

The change in the variable costs attributable to a case of hospital-acquired infection (HAI) is \$100.

The change in variable costs attributable to a new admission is \$750.

### Calculations

|                                                                        | 10%         | 5%          | 0%     |
|------------------------------------------------------------------------|-------------|-------------|--------|
| Incidence of wound infection                                           | 10%         | 5%          | 0%     |
| (1) Total admissions achieved <sup>a</sup>                             | 50,000      | 51,220      | 52,500 |
| (2) Extra cases that could be treated if incidence was 0% <sup>b</sup> | 2,500       | 1,280       | 0      |
| (3) Number that acquire HAI <sup>a</sup>                               | 5,000       | 2,561       | 0      |
| (4) Lost revenue (gross cost of HAI) <sup>a</sup>                      | \$3,125,000 | \$1,600,000 | \$0    |
| (5) Variable costs if extra cases were treated <sup>c</sup>            | \$1,875,000 | \$960,000   | \$0    |
| (6) Variable costs for each case of infection <sup>d</sup>             | \$500,000   | \$256,100   | \$0    |
| (7) Net cost of HAI <sup>e</sup>                                       | \$1,750,000 | \$896,100   | \$0    |

<sup>a</sup>See [Appendix 1](#) for details of how this figure is derived.

<sup>b</sup>Calculated by ([1] at 0%) – ([1] at 10%) and ([1] at 0%) – ([1] at 5%).

<sup>c</sup>Calculated by (2) x \$750.

<sup>d</sup>Calculated by (3) x \$100.

<sup>e</sup>Calculated by (4) + (6) – (5); these data are used to plot Line B2 in [Figure 1](#).
